# Supplementary material
Source: PubMed Central journal article supplement (PMC5003037)

**Supplemental Figure 1** Base peak ion chromatograms of four MM patients with lambda LC. Constant region peptides are in gold and identified variable regions in blue.

**Lambda patients**

AGVETTTPSK, 51-60      SYScQVTHEGSTVEK, 84-91

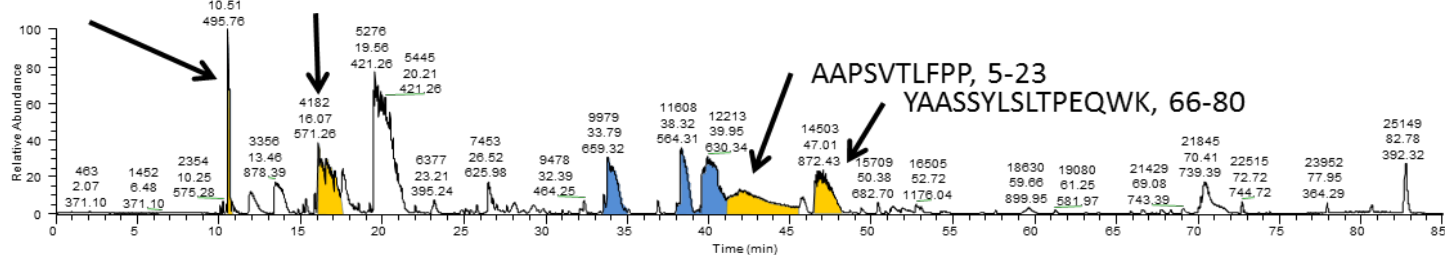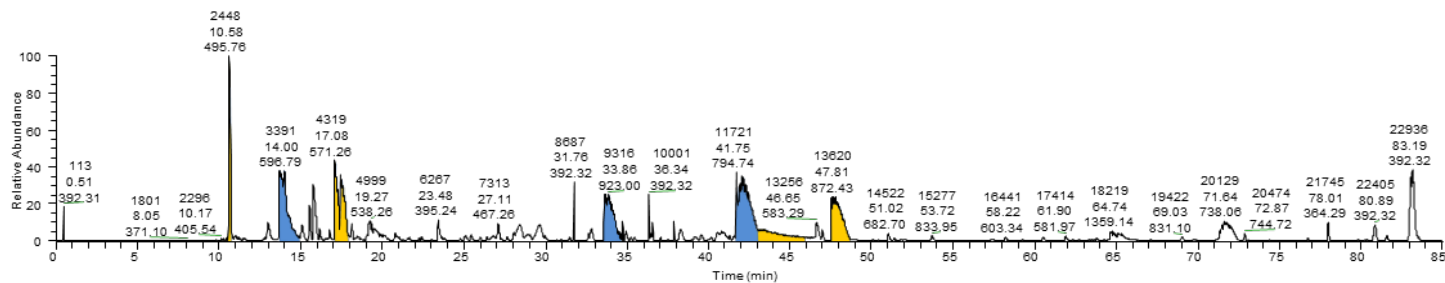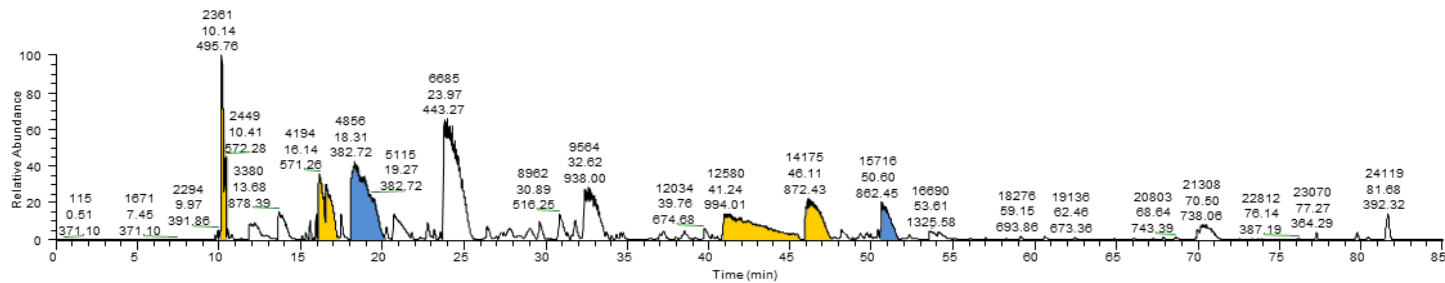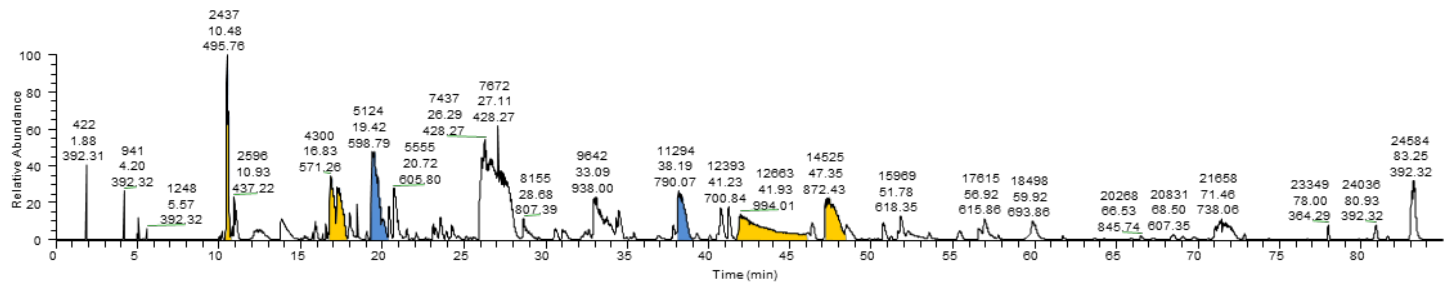

Supplement: NIHMS803301-supplement-Supplemental_Fig_1.pdf [file NIHMS803301-supplement-Supplemental_Fig_1.pdf]
