# Supplementary material
Source: PubMed Central journal article supplement (PMC5003037)
Supplement: NIHMS803301-supplement-Supplemental_Fig_2.pdf [file NIHMS803301-supplement-Supplemental_Fig_2.pdf]

## Supplemental Figure 2

>lambda 1

QSALTQPASMSGSPGQSITISCTGT**NNDLGTYNF**VSWYQQHPGKAP**KLVIVDVS**YRPSG**ISYR**FSGSKSAYTASLTISDLQAGDEADYYCT**SFTTDSTFV**FGG  
GTKLTVVGGPKAAPSVTLFPPSSEELQANKATLVCLISDFYPGAVTVAWKADSSPVKAGVETTTPSKQSNKYAASSYLSLTPEQWKSHRSYSCQVTHEGSTV  
EKT

>lambda 2

SYVLTQAPSVSAPGQTARIT**CEGNIGSKS**AHWYQQRPG**QAPVLVLYDSD**DRPSG**IPER**FSGSNSGNTATLIISGVEAGDEADFYC**QVWDNSNDHPV**FG  
GGTTLTVLGGPKAAPSVTLFPPSSEELQANKATLVCLISDFYPGAVTVAWKADSSPVKAGVETTTPSKQSNKYAASSYLSLTPEQWKSHRSYSCQVTHEGSTV  
VEKT

>lambda 3

YVLTQTPSVSVAPGQTARITCGGH**NIGSKSVH**WYQQ**QPGQAPLLVVYNN**DRPSW**IPER**FFGSNSGNTATLTVSGVEAGDEADYYC**QIWDSSGNPRVVF**  
**GGG**TKLTVLSQPKAAPSVTLFPPSSEELQANKATLVCLISDFYPGAVTVAWKADSSPVKAGVETTTPSKQSNKYAASSYLSLTPEQWKSHRSYSCQVTHEGSTV  
TVEKT

>lambda 4

YVLTQTPSVSVAPGQTARIT**CGGNIGYKSV**HWHQ**QPGQAPVLVVYDSD**DRPSG**IPER**FSGSNSGNTATLTISRVEAGDEADFYC**QVWDSSDQWV**FG  
GGTKLTVLGGPKAAPSVTLFPPSSEELQANKATLVCLISDFYPGAVTVAWKADSSPVKAGVETTTPSKQSNKYAASSYLSLTPEQWKSHRSYSCQVTHEGSTV  
VEKT

>kappa 1

IQMTQSPSSLSASVGDRVTITCR**ASQSISTSL**NWYQQ**KL**GKAP**KLLIYAAS**TLQ**SGVPSR**FSGSASGTDFTLTISLQPEDFATYFC**QQSYNSMYT**FGQGTKV  
EIKRTVAAPSVFIFPPSDEQLKSGTASVVCLLNNFYPREAKVQWQVDNALQSGNSQESVTEQDSKDYSLSTLTLSKADYEKHKVYACEVTHQGLSSPVTK  
FNR

>kappa 2

DIQMTQSPSSLSASVGDRVTIT**CQASQG**IT**KYLS**WYQQRPGKPP**KLLIYDAVN**LESG**VSSR**FSGSGSGTDFTLTISLQPEDIGTYC**QQYDSLPPD**FGGGTK  
VDIKRTVAAPSVFIFPPSDEQLKSGTASVVCLLNNFYPREAKVQWQVDNALQSGNSQESVTEQDSKDYSLSTLTLSKADYEKHKVYACEVTHQGLSSPVTK  
KSFNR

>kappa 3

DIQMTQSPSSLSASVGDRVTITCR**ASQGISNYL**AWFQQKPGKAP**KS**LV**YAAS**SL**QTGVPSK**FSGSGSGTDFTLTISLQPEDFATYFC**QQYNSYPYT**FGQGTK  
LEITRTVAAPSVFIFPPSDEQLKSGTASVVCLLNNFYPREAKVQWQVDNALQSGNSQESVTEQDSKDYSLSTLTLSKADYEKHKVYACEVTHQGLSSPVTK  
SFNR

>kappa 4

IQMTQSPSSLSASVGDRVTIT**CQASEDINNYL**NWYQQ**KPGKPPKVL**IY**DASN**LAT**GVPLR**FSGSGSGTDFNFTISNLQPEDVATYFC**QQYNNFPLT**FGGGT  
RAEVKRTVAAPSVFIFPPSDEQLKSGTASVVCLLNNFYPREAKVQWQVDNALQSGNSQESVTEQDSKDYSLSTLTLSKADYEKHKVYACEVTHQGLSSPVTK  
TKSFNR

**Supplemental Figure 2.** Eight Sanger sequenced light chains from eight MM patients. The red font indicates sequences corresponding to CDR1,2 and 3 as mapped by DomainGapAlign algorithm at the IMGT web portal. Tryptic peptides found by LC-MS/MS are indicated in bold font.
