# Supplementary material
Source: PubMed Central journal article supplement (PMC5003037)
Supplement: NIHMS803301-supplement-Supplemental_Fig_3.pdf [file NIHMS803301-supplement-Supplemental_Fig_3.pdf]

# Supplementary Figure 3

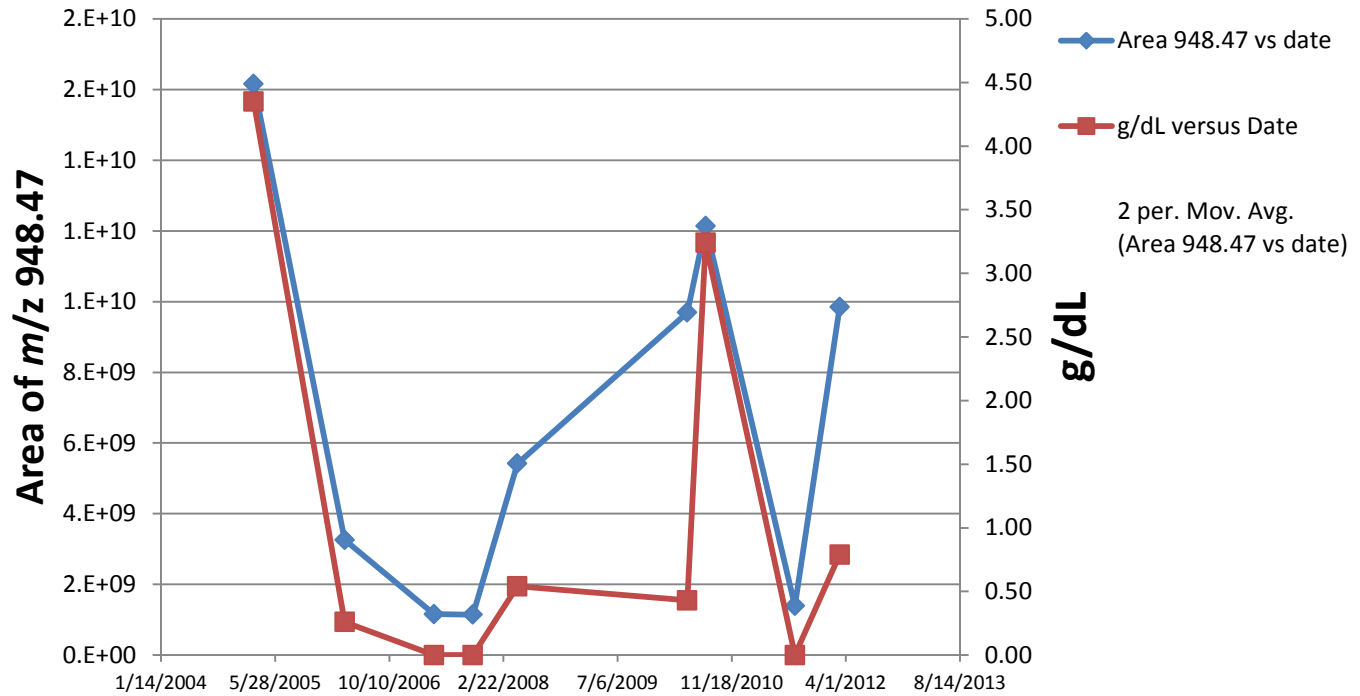

**Supplemental Figure 3** Time course of a second MM patient monitoring MRD for a single CDR tryptic peptide over time with a comparison to SPEP results.
