# Supplementary material
Source: PubMed Central journal article supplement (PMC5003037)
Supplement: NIHMS803301-supplement-Supplemental_Fig_5.pdf [file NIHMS803301-supplement-Supplemental_Fig_5.pdf]

# Supplemental Figure 5

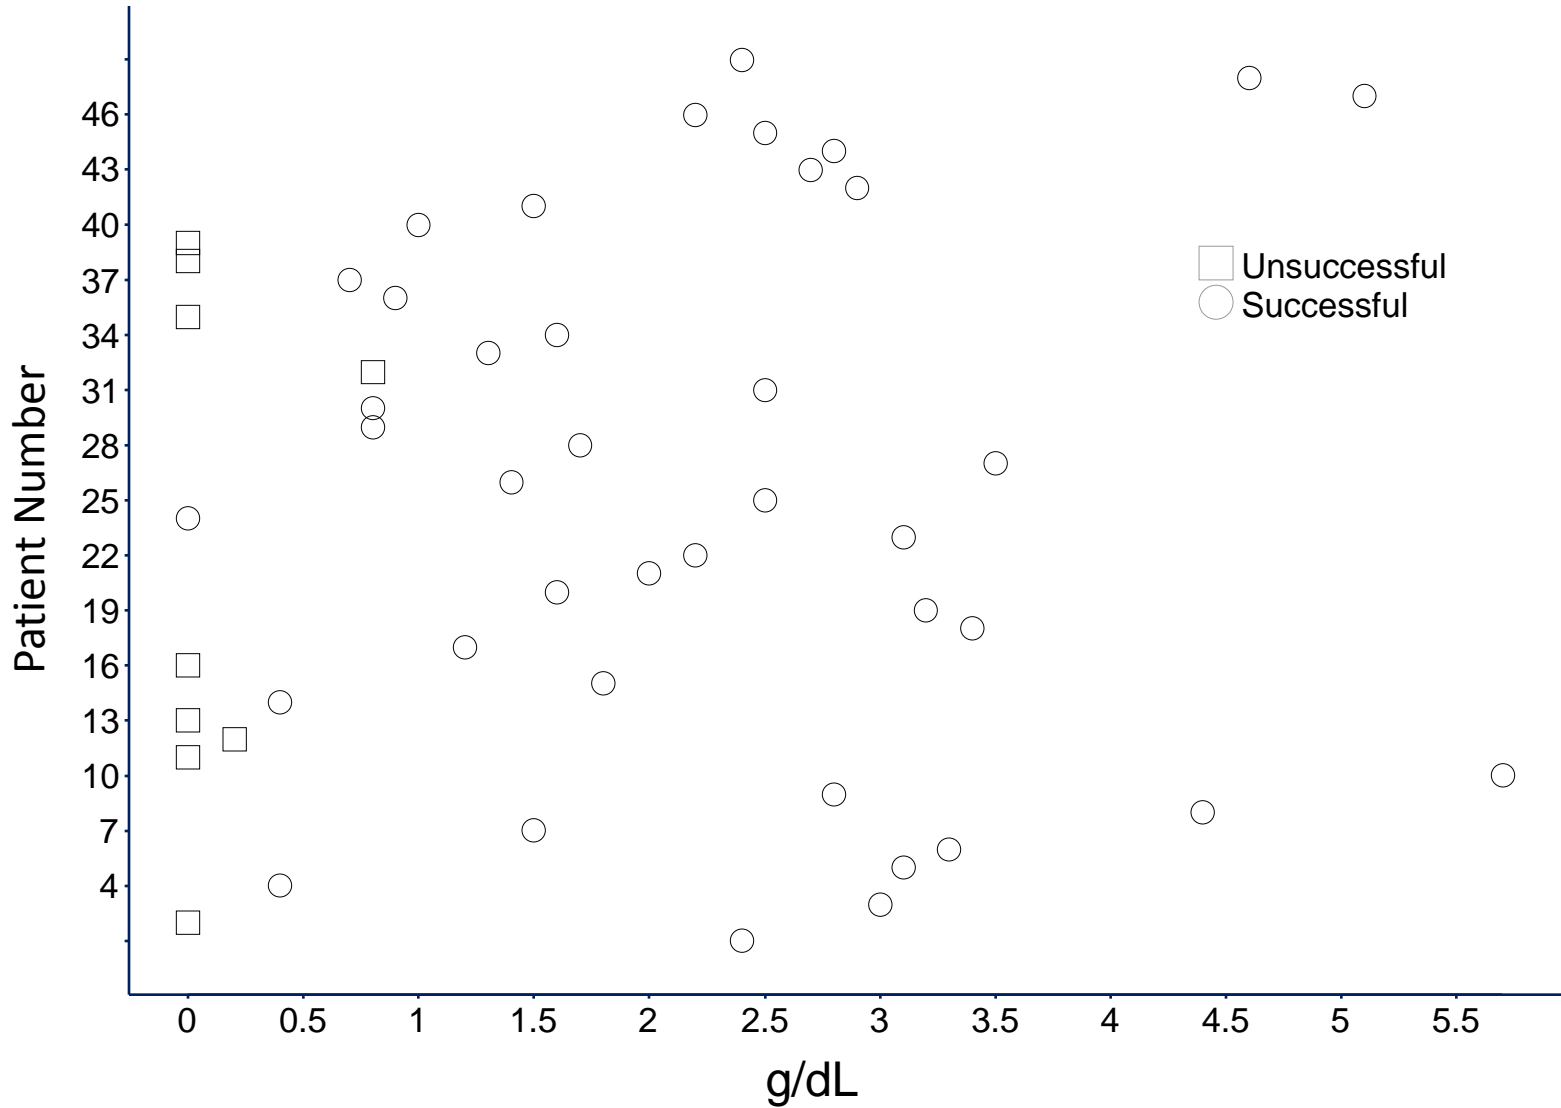

**Supplemental Figure 5** This figure provides an indication of how much M-spike protein is necessary to identify a CDR tryptic peptide in the initial serum/plasma sample. Forty-nine patients were analyzed pre and postautologous stem cell transplant. If a CDR tryptic peptide could be identified it was indicated with a circle in the scatter plot. If no CDR tryptic peptide could be identified it is indicated with a square. M-spike levels >0.8g/dL is required for successful identification of a CDR tryptic peptide.
