# Supplementary material
Source: PubMed Central journal article supplement (PMC5003037)
Supplement: NIHMS803301-supplement-Supplemental_Table_1.pdf [file NIHMS803301-supplement-Supplemental_Table_1.pdf]

## Supplementary Table 1

LVIYDVSYR

LVLYDVSYR

PGQAPVLVLYDDSDRPSGIPER

GPAGAPVLVLYDDSDRPSGLPER

PGQAPLLVVYYNNDRPSWIPER

PGQAPVLVIYYDNDRPSWIPER

PGQAPVLVVYDDSDRSGIPER

GPQAPVLVVYDDSDREKPER

ASQSISTSLNWYQQK

ASGASLSTSNWYQQK

VTITCQASQGITK

VTITCQASQGAISK

SLVYAASSLQTGVPSK

SLIYGASTLQSGVPSK

VLIYDASNLATGVPLR

VLLYDASNLATGVPLR

**Supplementary Table 1** Comparison of a sample of CDR tryptic peptide sequences translated from DNA sequence (top) and sequences obtained by mass spectrometry and the PEAKS software (bottom). I and L, SGI and EK, Q and AG, IT and AIS all have the same nominal mass the software was not able to distinguish and are highlighted by bold/underline.
